# Supplementary material for: Mechanism, thermochemistry, and kinetics of the reversible reactions: C2H3 + H2 ⇌ C2H4 + H ⇌ C2H5
Source: Royal Society of Chemistry journal article supplement (doi:10.1039/d1fd00124h), 2022-01-01
Supplement: d1fd00124h1.pdf [file d1fd00124h1.pdf]

### \*\*\*Supplementary Material\*\*\*

#### Mechanism, Thermochemistry, and Kinetics of the Reversible Reactions:

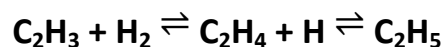

Thanh Lam Nguyen,<sup>1</sup> David H. Bross,<sup>2</sup> Branko Ruscic,<sup>2</sup> G. Barney Ellison,<sup>3</sup> and John F. Stanton<sup>\*,1</sup>

<sup>1</sup>Quantum Theory Project, Department of Chemistry and Physics, University of Florida, Gainesville, FL 32611 (USA).

<sup>2</sup>Chemical Sciences and Engineering Division, Argonne National Laboratory, Lemont, Illinois 60439, United States.

<sup>3</sup>Department of Chemistry, University of Colorado, Boulder, CO 80309 (USA).

Corresponding author: [johnstanton@ufl.edu](mailto:johnstanton@ufl.edu)

#### **Table of contents:**

Page 2: E,J-resolved ME model for a thermally activated reaction,

Page 3-19: Tables S1-S6,

Page 20-23: Optimized geometries of various species,

Page 24-34: Ro-vibrational parameters and anharmonic constants for various species.

## E,J-resolved master equation model for a thermally activated reaction

E,J-resolved master equation model for a thermally activated reaction ( $C_2H_5 \rightarrow C_2H_4 + H$ ), which has a well and a product channel, is given by:

$$\begin{aligned} \frac{\partial C_{C_2H_5}(E_i J_i t)}{\partial t} &= \sum_{J_k=0}^{J_{max}} \sum_{E_k=0}^{E_{max}} \omega_{LJ} \cdot P(E_i J_i | E_k J_k) \cdot C_{C_2H_5}(E_k J_k t) \cdot \Delta E - \omega_{LJ} \cdot C_{C_2H_5}(E_i J_i t) - k_{C_2H_5 \rightarrow C_2H_4 + H}(E_i J_i) \cdot C_{C_2H_5}(E_i J_i t) \end{aligned} \quad (S1)$$

All terms have been defined in the main text. Here initial energy distribution of  $C_2H_5$  is assumed to be Boltzmann thermal energy distribution function:

$$F_{C_2H_5}(E_i J_i) = \frac{(2J_i + 1) \cdot \rho_{C_2H_5}(E_i J_i) \cdot \exp\left(\frac{-E_i}{RT}\right)}{\sum_{J_i=0}^{J_{max}} (2J_i + 1) \int_{E_i=0}^{E_{max}} \rho_{C_2H_5}(E_i J_i) \cdot \exp\left(\frac{-E_i}{RT}\right) \cdot dE_i} \quad (S2)$$

Eq. (S1) can be cast in the matrix form:

$$\frac{\partial C}{\partial t} = MC \quad (S3)$$

The reaction rate coefficient,  $k_{\text{uni.}}(T,p)$ , is equally assigned to the lowest eigenvalue of  $M$ .

$$k_{\text{uni.}}(T,p) = |\lambda_1| \quad (\text{S4})$$

**Table S1:** Calculated thermal rate coefficients (in  $\text{cm}^3/\text{s}$ ) for the  $\text{C}_2\text{H}_3 + \text{H}_2 \rightarrow \text{C}_2\text{H}_4 + \text{H}$  reaction using the SCTST theory.

| T (K) | 1000/T (1/K) | $k(T)_1$ ( $\text{cm}^3/\text{s}$ ) |
|-------|--------------|-------------------------------------|
| 300   | 3.33333333   | 4.12E-18                            |
| 325   | 3.07692308   | 1.05E-17                            |
| 350   | 2.85714286   | 2.39E-17                            |
| 375   | 2.66666667   | 4.94E-17                            |
| 400   | 2.5          | 9.41E-17                            |
| 425   | 2.35294118   | 1.68E-16                            |
| 450   | 2.22222222   | 2.82E-16                            |
| 475   | 2.10526316   | 4.52E-16                            |
| 500   | 2            | 6.94E-16                            |
| 525   | 1.9047619    | 1.03E-15                            |
| 550   | 1.81818182   | 1.48E-15                            |
| 575   | 1.73913043   | 2.06E-15                            |
| 600   | 1.66666667   | 2.81E-15                            |
| 625   | 1.6          | 3.75E-15                            |
| 650   | 1.53846154   | 4.90E-15                            |
| 675   | 1.48148148   | 6.30E-15                            |
| 700   | 1.42857143   | 7.98E-15                            |
| 725   | 1.37931034   | 9.96E-15                            |
| 750   | 1.33333333   | 1.23E-14                            |
| 775   | 1.29032258   | 1.50E-14                            |
| 800   | 1.25         | 1.81E-14                            |
| 825   | 1.21212121   | 2.16E-14                            |
| 850   | 1.17647059   | 2.56E-14                            |
| 875   | 1.14285714   | 3.01E-14                            |
| 900   | 1.11111111   | 3.52E-14                            |
| 925   | 1.08108108   | 4.08E-14                            |
| 950   | 1.05263158   | 4.70E-14                            |

|      |            |          |
|------|------------|----------|
| 975  | 1.02564103 | 5.39E-14 |
| 1000 | 1          | 6.14E-14 |
| 1025 | 0.97560976 | 6.96E-14 |
| 1050 | 0.95238095 | 7.86E-14 |
| 1075 | 0.93023256 | 8.83E-14 |
| 1100 | 0.90909091 | 9.88E-14 |
| 1125 | 0.88888889 | 1.10E-13 |
| 1150 | 0.86956522 | 1.22E-13 |
| 1175 | 0.85106383 | 1.35E-13 |
| 1200 | 0.83333333 | 1.49E-13 |
| 1225 | 0.81632653 | 1.64E-13 |
| 1250 | 0.8        | 1.80E-13 |
| 1275 | 0.78431373 | 1.97E-13 |
| 1300 | 0.76923077 | 2.15E-13 |
| 1325 | 0.75471698 | 2.34E-13 |
| 1350 | 0.74074074 | 2.54E-13 |
| 1375 | 0.72727273 | 2.76E-13 |
| 1400 | 0.71428571 | 2.98E-13 |
| 1425 | 0.70175439 | 3.21E-13 |
| 1450 | 0.68965517 | 3.46E-13 |
| 1475 | 0.6779661  | 3.72E-13 |
| 1500 | 0.66666667 | 3.99E-13 |
| 1525 | 0.6557377  | 4.27E-13 |
| 1550 | 0.64516129 | 4.57E-13 |
| 1575 | 0.63492063 | 4.88E-13 |
| 1600 | 0.625      | 5.20E-13 |
| 1625 | 0.61538462 | 5.53E-13 |
| 1650 | 0.60606061 | 5.88E-13 |
| 1675 | 0.59701493 | 6.24E-13 |
| 1700 | 0.58823529 | 6.61E-13 |
| 1725 | 0.57971014 | 7.00E-13 |
| 1750 | 0.57142857 | 7.40E-13 |
| 1775 | 0.56338028 | 7.81E-13 |
| 1800 | 0.55555556 | 8.24E-13 |
| 1825 | 0.54794521 | 8.68E-13 |
| 1850 | 0.54054054 | 9.13E-13 |
| 1875 | 0.53333333 | 9.60E-13 |
| 1900 | 0.52631579 | 1.01E-12 |
| 1925 | 0.51948052 | 1.06E-12 |

|      |            |          |
|------|------------|----------|
| 1950 | 0.51282051 | 1.11E-12 |
| 1975 | 0.50632911 | 1.16E-12 |
| 2000 | 0.5        | 1.21E-12 |
| 2025 | 0.49382716 | 1.27E-12 |
| 2050 | 0.48780488 | 1.33E-12 |
| 2075 | 0.48192771 | 1.38E-12 |
| 2100 | 0.47619048 | 1.44E-12 |
| 2125 | 0.47058824 | 1.50E-12 |
| 2150 | 0.46511628 | 1.56E-12 |
| 2175 | 0.45977011 | 1.63E-12 |
| 2200 | 0.45454545 | 1.69E-12 |
| 2225 | 0.4494382  | 1.76E-12 |
| 2250 | 0.44444444 | 1.82E-12 |
| 2275 | 0.43956044 | 1.89E-12 |
| 2300 | 0.43478261 | 1.96E-12 |
| 2325 | 0.43010753 | 2.03E-12 |
| 2350 | 0.42553191 | 2.10E-12 |
| 2375 | 0.42105263 | 2.17E-12 |
| 2400 | 0.41666667 | 2.25E-12 |
| 2425 | 0.41237113 | 2.32E-12 |
| 2450 | 0.40816327 | 2.40E-12 |
| 2475 | 0.4040404  | 2.48E-12 |
| 2500 | 0.4        | 2.55E-12 |
| 2525 | 0.3960396  | 2.63E-12 |
| 2550 | 0.39215686 | 2.71E-12 |
| 2575 | 0.38834951 | 2.79E-12 |
| 2600 | 0.38461538 | 2.88E-12 |
| 2625 | 0.38095238 | 2.96E-12 |
| 2650 | 0.37735849 | 3.04E-12 |
| 2675 | 0.37383178 | 3.13E-12 |
| 2700 | 0.37037037 | 3.21E-12 |
| 2725 | 0.36697248 | 3.30E-12 |
| 2750 | 0.36363636 | 3.39E-12 |
| 2775 | 0.36036036 | 3.47E-12 |
| 2800 | 0.35714286 | 3.56E-12 |
| 2825 | 0.3539823  | 3.65E-12 |
| 2850 | 0.35087719 | 3.74E-12 |
| 2875 | 0.34782609 | 3.83E-12 |
| 2900 | 0.34482759 | 3.92E-12 |

|      |            |          |
|------|------------|----------|
| 2925 | 0.34188034 | 4.01E-12 |
| 2950 | 0.33898305 | 4.10E-12 |
| 2975 | 0.33613445 | 4.19E-12 |
| 3000 | 0.33333333 | 4.28E-12 |
| 3025 | 0.33057851 | 4.37E-12 |
| 3050 | 0.32786885 | 4.46E-12 |
| 3075 | 0.32520325 | 4.56E-12 |
| 3100 | 0.32258065 | 4.65E-12 |
| 3125 | 0.32       | 4.74E-12 |
| 3150 | 0.31746032 | 4.83E-12 |
| 3175 | 0.31496063 | 4.92E-12 |
| 3200 | 0.3125     | 5.01E-12 |
| 3225 | 0.31007752 | 5.10E-12 |
| 3250 | 0.30769231 | 5.19E-12 |
| 3275 | 0.30534351 | 5.28E-12 |
| 3300 | 0.3030303  | 5.37E-12 |
| 3325 | 0.30075188 | 5.46E-12 |
| 3350 | 0.29850746 | 5.55E-12 |
| 3375 | 0.2962963  | 5.64E-12 |
| 3400 | 0.29411765 | 5.72E-12 |
| 3425 | 0.2919708  | 5.81E-12 |
| 3450 | 0.28985507 | 5.89E-12 |
| 3475 | 0.28776978 | 5.98E-12 |
| 3500 | 0.28571429 | 6.06E-12 |

**Table S2:** Calculated thermal rate coefficients (in cm<sup>3</sup>/s) for the C<sub>2</sub>H<sub>4</sub> + H → C<sub>2</sub>H<sub>3</sub> + H<sub>2</sub> reaction using the SCTST theory and the equilibrium constant (K<sub>eq</sub>).

| T (K) | 1000/T (1/K) | k(T) <sub>-1</sub> |
|-------|--------------|--------------------|
| 1000  | 1            | 1.30E-13           |
| 1025  | 0.975609756  | 1.60E-13           |
| 1050  | 0.952380952  | 1.96E-13           |
| 1075  | 0.930232558  | 2.36E-13           |
| 1100  | 0.909090909  | 2.84E-13           |
| 1125  | 0.888888889  | 3.38E-13           |
| 1150  | 0.869565217  | 4.00E-13           |
| 1175  | 0.85106383   | 4.70E-13           |
| 1200  | 0.833333333  | 5.50E-13           |
| 1225  | 0.816326531  | 6.39E-13           |
| 1250  | 0.8          | 7.39E-13           |
| 1275  | 0.784313725  | 8.49E-13           |
| 1300  | 0.769230769  | 9.72E-13           |
| 1325  | 0.754716981  | 1.11E-12           |
| 1350  | 0.740740741  | 1.26E-12           |
| 1375  | 0.727272727  | 1.42E-12           |
| 1400  | 0.714285714  | 1.60E-12           |
| 1425  | 0.701754386  | 1.79E-12           |
| 1450  | 0.689655172  | 2.00E-12           |
| 1475  | 0.677966102  | 2.23E-12           |
| 1500  | 0.666666667  | 2.48E-12           |
| 1525  | 0.655737705  | 2.74E-12           |
| 1550  | 0.64516129   | 3.02E-12           |
| 1575  | 0.634920635  | 3.33E-12           |
| 1600  | 0.625        | 3.65E-12           |
| 1625  | 0.615384615  | 4.00E-12           |
| 1650  | 0.606060606  | 4.37E-12           |
| 1675  | 0.597014925  | 4.76E-12           |
| 1700  | 0.588235294  | 5.17E-12           |
| 1725  | 0.579710145  | 5.61E-12           |
| 1750  | 0.571428571  | 6.07E-12           |
| 1775  | 0.563380282  | 6.56E-12           |
| 1800  | 0.555555556  | 7.07E-12           |

|      |             |          |
|------|-------------|----------|
| 1825 | 0.547945205 | 7.61E-12 |
| 1850 | 0.540540541 | 8.17E-12 |
| 1875 | 0.533333333 | 8.76E-12 |
| 1900 | 0.526315789 | 9.38E-12 |
| 1925 | 0.519480519 | 1.00E-11 |
| 1950 | 0.512820513 | 1.07E-11 |
| 1975 | 0.506329114 | 1.14E-11 |
| 2000 | 0.5         | 1.21E-11 |
| 2025 | 0.49382716  | 1.29E-11 |
| 2050 | 0.487804878 | 1.37E-11 |
| 2075 | 0.481927711 | 1.45E-11 |
| 2100 | 0.476190476 | 1.53E-11 |
| 2125 | 0.470588235 | 1.62E-11 |
| 2150 | 0.465116279 | 1.71E-11 |
| 2175 | 0.459770115 | 1.80E-11 |
| 2200 | 0.454545455 | 1.90E-11 |
| 2225 | 0.449438202 | 2.00E-11 |
| 2250 | 0.444444444 | 2.10E-11 |
| 2275 | 0.43956044  | 2.20E-11 |
| 2300 | 0.434782609 | 2.31E-11 |
| 2325 | 0.430107527 | 2.42E-11 |
| 2350 | 0.425531915 | 2.53E-11 |
| 2375 | 0.421052632 | 2.65E-11 |
| 2400 | 0.416666667 | 2.77E-11 |
| 2425 | 0.412371134 | 2.89E-11 |
| 2450 | 0.408163265 | 3.01E-11 |
| 2475 | 0.404040404 | 3.14E-11 |
| 2500 | 0.4         | 3.27E-11 |
| 2525 | 0.396039604 | 3.40E-11 |
| 2550 | 0.392156863 | 3.54E-11 |
| 2575 | 0.388349515 | 3.67E-11 |
| 2600 | 0.384615385 | 3.81E-11 |
| 2625 | 0.380952381 | 3.95E-11 |
| 2650 | 0.377358491 | 4.10E-11 |
| 2675 | 0.373831776 | 4.25E-11 |
| 2700 | 0.37037037  | 4.39E-11 |
| 2725 | 0.366972477 | 4.55E-11 |
| 2750 | 0.363636364 | 4.70E-11 |
| 2775 | 0.36036036  | 4.85E-11 |



|      |             |          |
|------|-------------|----------|
| 2800 | 0.357142857 | 5.01E-11 |
| 2825 | 0.353982301 | 5.17E-11 |
| 2850 | 0.350877193 | 5.33E-11 |
| 2875 | 0.347826087 | 5.49E-11 |
| 2900 | 0.344827586 | 5.66E-11 |
| 2925 | 0.341880342 | 5.82E-11 |
| 2950 | 0.338983051 | 5.99E-11 |
| 2975 | 0.336134454 | 6.16E-11 |
| 3000 | 0.333333333 | 6.33E-11 |
| 3025 | 0.330578512 | 6.50E-11 |
| 3050 | 0.327868852 | 6.68E-11 |
| 3075 | 0.325203252 | 6.85E-11 |
| 3100 | 0.322580645 | 7.02E-11 |
| 3125 | 0.32        | 7.20E-11 |
| 3150 | 0.317460317 | 7.37E-11 |
| 3175 | 0.31496063  | 7.55E-11 |
| 3200 | 0.3125      | 7.73E-11 |
| 3225 | 0.310077519 | 7.91E-11 |
| 3250 | 0.307692308 | 8.09E-11 |
| 3275 | 0.305343511 | 8.26E-11 |
| 3300 | 0.303030303 | 8.44E-11 |
| 3325 | 0.30075188  | 8.62E-11 |
| 3350 | 0.298507463 | 8.80E-11 |
| 3375 | 0.296296296 | 8.98E-11 |
| 3400 | 0.294117647 | 9.16E-11 |
| 3425 | 0.291970803 | 9.34E-11 |
| 3450 | 0.289855072 | 9.51E-11 |
| 3475 | 0.287769784 | 9.69E-11 |
| 3500 | 0.285714286 | 9.87E-11 |

**Table S3:** Calculated thermal rate coefficients (in cm<sup>3</sup>/s) at the high-pressure limit (i.e. the capture rate constants) for the C<sub>2</sub>H<sub>4</sub> + H → C<sub>2</sub>H<sub>5</sub> reaction using the SCTST theory.

| T (K) | k(T) <sub>2</sub> (cm <sup>3</sup> /s) |
|-------|----------------------------------------|
| 200   | 2.08E-13                               |
| 225   | 3.30E-13                               |
| 250   | 4.96E-13                               |
| 275   | 7.10E-13                               |
| 300   | 9.76E-13                               |
| 325   | 1.29E-12                               |
| 350   | 1.67E-12                               |
| 375   | 2.10E-12                               |
| 400   | 2.58E-12                               |
| 425   | 3.12E-12                               |
| 450   | 3.71E-12                               |
| 475   | 4.36E-12                               |
| 500   | 5.05E-12                               |
| 525   | 5.80E-12                               |
| 550   | 6.59E-12                               |
| 575   | 7.43E-12                               |
| 600   | 8.32E-12                               |
| 625   | 9.25E-12                               |
| 650   | 1.02E-11                               |
| 675   | 1.12E-11                               |
| 700   | 1.23E-11                               |
| 725   | 1.34E-11                               |
| 750   | 1.45E-11                               |
| 775   | 1.57E-11                               |
| 800   | 1.69E-11                               |
| 825   | 1.81E-11                               |
| 850   | 1.94E-11                               |
| 875   | 2.07E-11                               |
| 900   | 2.20E-11                               |
| 925   | 2.34E-11                               |
| 950   | 2.48E-11                               |
| 975   | 2.62E-11                               |
| 1000  | 2.76E-11                               |
| 1025  | 2.91E-11                               |

|      |          |
|------|----------|
| 1050 | 3.06E-11 |
| 1075 | 3.21E-11 |
| 1100 | 3.37E-11 |
| 1125 | 3.52E-11 |
| 1150 | 3.68E-11 |
| 1175 | 3.84E-11 |
| 1200 | 4.00E-11 |
| 1225 | 4.17E-11 |
| 1250 | 4.33E-11 |
| 1275 | 4.50E-11 |
| 1300 | 4.67E-11 |
| 1325 | 4.84E-11 |
| 1350 | 5.02E-11 |
| 1375 | 5.19E-11 |
| 1400 | 5.37E-11 |
| 1425 | 5.55E-11 |
| 1450 | 5.73E-11 |
| 1475 | 5.91E-11 |
| 1500 | 6.09E-11 |
| 1525 | 6.27E-11 |
| 1550 | 6.46E-11 |
| 1575 | 6.64E-11 |
| 1600 | 6.83E-11 |
| 1625 | 7.02E-11 |
| 1650 | 7.21E-11 |
| 1675 | 7.40E-11 |
| 1700 | 7.59E-11 |
| 1725 | 7.79E-11 |
| 1750 | 7.98E-11 |
| 1775 | 8.17E-11 |
| 1800 | 8.37E-11 |
| 1825 | 8.57E-11 |
| 1850 | 8.76E-11 |
| 1875 | 8.96E-11 |
| 1900 | 9.16E-11 |
| 1925 | 9.36E-11 |
| 1950 | 9.56E-11 |
| 1975 | 9.77E-11 |

|      |          |
|------|----------|
| 2000 | 9.97E-11 |
| 2025 | 1.02E-10 |
| 2050 | 1.04E-10 |
| 2075 | 1.06E-10 |
| 2100 | 1.08E-10 |
| 2125 | 1.10E-10 |
| 2150 | 1.12E-10 |
| 2175 | 1.14E-10 |
| 2200 | 1.16E-10 |
| 2225 | 1.18E-10 |
| 2250 | 1.20E-10 |
| 2275 | 1.22E-10 |
| 2300 | 1.25E-10 |
| 2325 | 1.27E-10 |
| 2350 | 1.29E-10 |
| 2375 | 1.31E-10 |
| 2400 | 1.33E-10 |
| 2425 | 1.35E-10 |
| 2450 | 1.37E-10 |
| 2475 | 1.39E-10 |
| 2500 | 1.42E-10 |
| 2525 | 1.44E-10 |
| 2550 | 1.46E-10 |
| 2575 | 1.48E-10 |

**Table S4:** Calculated reaction rate coefficients (cm<sup>3</sup>/s) as functions of temperature and pressure for the C<sub>2</sub>H<sub>4</sub> + H → C<sub>2</sub>H<sub>5</sub> reaction using the ME/SCTST approach.

| T (K) / P(atm) | 0.5      | 1        | 5        | 10       | 50       | 100      |
|----------------|----------|----------|----------|----------|----------|----------|
| 300            | 8.84E-13 | 9.23E-13 | 9.63E-13 | 9.69E-13 | 9.74E-13 | 9.75E-13 |
| 400            | 2.01E-12 | 2.20E-12 | 2.47E-12 | 2.52E-12 | 2.57E-12 | 2.57E-12 |
| 500            | 3.10E-12 | 3.62E-12 | 4.49E-12 | 4.72E-12 | 4.97E-12 | 5.01E-12 |
| 600            | 3.77E-12 | 4.66E-12 | 6.55E-12 | 7.15E-12 | 7.96E-12 | 8.12E-12 |
| 700            | 3.89E-12 | 5.10E-12 | 8.13E-12 | 9.29E-12 | 1.12E-11 | 1.16E-11 |
| 800            | 3.66E-12 | 5.04E-12 | 9.05E-12 | 1.09E-11 | 1.43E-11 | 1.53E-11 |
| 900            | 3.14E-12 | 4.52E-12 | 9.08E-12 | 1.14E-11 | 1.67E-11 | 1.85E-11 |
| 1000           | 2.54E-12 | 3.80E-12 | 8.47E-12 | 1.12E-11 | 1.81E-11 | 2.09E-11 |
| 1100           | 1.96E-12 | 3.04E-12 | 7.44E-12 | 1.03E-11 | 1.85E-11 | 2.22E-11 |
| 1200           | 1.47E-12 | 2.36E-12 | 6.27E-12 | 9.01E-12 | 1.79E-11 | 2.24E-11 |
| 1300           | 1.09E-12 | 1.80E-12 | 5.13E-12 | 7.64E-12 | 1.66E-11 | 2.17E-11 |
| 1400           | 8.15E-13 | 1.37E-12 | 4.14E-12 | 6.36E-12 | 1.50E-11 | 2.03E-11 |
| 1500           | 6.07E-13 | 1.04E-12 | 3.30E-12 | 5.20E-12 | 1.32E-11 | 1.84E-11 |
| 1550           | 5.29E-13 | 9.10E-13 | 2.96E-12 | 4.71E-12 | 1.23E-11 | 1.75E-11 |
| 1600           | 4.61E-13 | 7.98E-13 | 2.64E-12 | 4.25E-12 | 1.14E-11 | 1.65E-11 |
| 1700           | 3.56E-13 | 6.23E-13 | 2.13E-12 | 3.49E-12 | 9.87E-12 | 1.46E-11 |
| 1800           | 2.80E-13 | 4.94E-13 | 1.74E-12 | 2.89E-12 | 8.51E-12 | 1.29E-11 |
| 1900           | 2.23E-13 | 3.98E-13 | 1.43E-12 | 2.40E-12 | 7.34E-12 | 1.13E-11 |
| 2000           | 1.82E-13 | 3.27E-13 | 1.19E-12 | 2.03E-12 | 6.38E-12 | 1.00E-11 |
| 2200           | 1.27E-13 | 2.30E-13 | 8.65E-13 | 1.49E-12 | 4.91E-12 | 7.88E-12 |
| 2400           | 9.42E-14 | 1.71E-13 | 6.57E-13 | 1.14E-12 | 3.89E-12 | 6.36E-12 |
| 2500           | 8.28E-14 | 1.52E-13 | 5.83E-13 | 1.02E-12 | 3.51E-12 | 5.78E-12 |
| 2600           | 7.34E-14 | 1.35E-13 | 5.22E-13 | 9.17E-13 | 3.19E-12 | 5.28E-12 |
| 2800           | 5.95E-14 | 1.10E-13 | 4.29E-13 | 7.58E-13 | 2.68E-12 | 4.48E-12 |
| 3000           | 4.98E-14 | 9.17E-14 | 3.63E-13 | 6.45E-13 | 2.31E-12 | 3.89E-12 |
| 3200           | 4.28E-14 | 7.91E-14 | 3.15E-13 | 5.61E-13 | 2.03E-12 | 3.43E-12 |
| 3400           | 3.76E-14 | 6.94E-14 | 2.78E-13 | 4.96E-13 | 1.81E-12 | 3.07E-12 |
| 3500           | 3.53E-14 | 6.52E-14 | 2.62E-13 | 4.68E-13 | 1.71E-12 | 2.91E-12 |

**Table S4 (Continued):** Calculated reaction rate coefficients (cm<sup>3</sup>/s) as functions of temperature and pressure for the C<sub>2</sub>H<sub>4</sub> + H → C<sub>2</sub>H<sub>5</sub> reaction using the ME/SCTST approach.

| P (Torr) / T(K) | 285 K    | 298 K    | 400 K    | 511 K    | 604 K    |
|-----------------|----------|----------|----------|----------|----------|
| 0.1             | 3.62E-14 | 3.61E-14 | 3.26E-14 | 2.46E-14 | 1.78E-14 |
| 0.2             | 5.43E-14 | 5.49E-14 | 5.33E-14 | 4.21E-14 | 3.13E-14 |
| 0.3             | 6.83E-14 | 6.96E-14 | 7.05E-14 | 5.74E-14 | 4.35E-14 |
| 0.4             | 8.02E-14 | 8.20E-14 | 8.58E-14 | 7.14E-14 | 5.47E-14 |
| 0.5             | 9.05E-14 | 9.30E-14 | 9.98E-14 | 8.44E-14 | 6.53E-14 |
| 0.6             | 9.98E-14 | 1.03E-13 | 1.13E-13 | 9.67E-14 | 7.55E-14 |
| 0.7             | 1.08E-13 | 1.12E-13 | 1.25E-13 | 1.08E-13 | 8.52E-14 |
| 0.8             | 1.16E-13 | 1.20E-13 | 1.36E-13 | 1.20E-13 | 9.46E-14 |
| 0.9             | 1.23E-13 | 1.28E-13 | 1.47E-13 | 1.30E-13 | 1.04E-13 |
| 1               | 1.30E-13 | 1.36E-13 | 1.57E-13 | 1.41E-13 | 1.12E-13 |
| 2               | 1.83E-13 | 1.94E-13 | 2.44E-13 | 2.30E-13 | 1.91E-13 |
| 3               | 2.21E-13 | 2.35E-13 | 3.11E-13 | 3.05E-13 | 2.57E-13 |
| 4               | 2.51E-13 | 2.69E-13 | 3.68E-13 | 3.69E-13 | 3.17E-13 |
| 5               | 2.76E-13 | 2.97E-13 | 4.18E-13 | 4.28E-13 | 3.71E-13 |
| 6               | 2.97E-13 | 3.21E-13 | 4.62E-13 | 4.81E-13 | 4.21E-13 |
| 7               | 3.16E-13 | 3.42E-13 | 5.02E-13 | 5.30E-13 | 4.69E-13 |
| 8               | 3.32E-13 | 3.61E-13 | 5.39E-13 | 5.76E-13 | 5.13E-13 |
| 9               | 3.47E-13 | 3.78E-13 | 5.73E-13 | 6.19E-13 | 5.55E-13 |
| 10              | 3.61E-13 | 3.94E-13 | 6.04E-13 | 6.59E-13 | 5.95E-13 |
| 20              | 4.53E-13 | 5.02E-13 | 8.39E-13 | 9.80E-13 | 9.24E-13 |
| 30              | 5.07E-13 | 5.66E-13 | 9.96E-13 | 1.21E-12 | 1.17E-12 |
| 40              | 5.44E-13 | 6.11E-13 | 1.11E-12 | 1.40E-12 | 1.38E-12 |
| 50              | 5.72E-13 | 6.44E-13 | 1.21E-12 | 1.55E-12 | 1.56E-12 |
| 60              | 5.93E-13 | 6.71E-13 | 1.28E-12 | 1.68E-12 | 1.71E-12 |
| 70              | 6.11E-13 | 6.92E-13 | 1.35E-12 | 1.80E-12 | 1.85E-12 |
| 80              | 6.25E-13 | 7.10E-13 | 1.41E-12 | 1.90E-12 | 1.98E-12 |
| 90              | 6.37E-13 | 7.25E-13 | 1.46E-12 | 1.99E-12 | 2.09E-12 |
| 100             | 6.48E-13 | 7.39E-13 | 1.50E-12 | 2.08E-12 | 2.20E-12 |
| 200             | 7.07E-13 | 8.14E-13 | 1.78E-12 | 2.66E-12 | 2.98E-12 |
| 300             | 7.33E-13 | 8.48E-13 | 1.93E-12 | 3.00E-12 | 3.48E-12 |
| 400             | 7.49E-13 | 8.68E-13 | 2.02E-12 | 3.25E-12 | 3.85E-12 |
| 500             | 7.59E-13 | 8.81E-13 | 2.09E-12 | 3.43E-12 | 4.14E-12 |
| 600             | 7.66E-13 | 8.91E-13 | 2.14E-12 | 3.58E-12 | 4.38E-12 |
| 700             | 7.71E-13 | 8.98E-13 | 2.18E-12 | 3.70E-12 | 4.59E-12 |
| 800             | 7.75E-13 | 9.04E-13 | 2.22E-12 | 3.80E-12 | 4.76E-12 |

|      |          |          |          |          |          |
|------|----------|----------|----------|----------|----------|
| 900  | 7.79E-13 | 9.08E-13 | 2.24E-12 | 3.89E-12 | 4.92E-12 |
| 1000 | 7.81E-13 | 9.12E-13 | 2.27E-12 | 3.96E-12 | 5.06E-12 |

**Table S5:** A comparison of the calculated rate coefficients ( $\text{cm}^3/\text{s}$ ) at 800 K as a function of pressure for the  $\text{C}_2\text{H}_4 + \text{H} \rightarrow \text{C}_2\text{H}_5$  reaction using four different ME approaches

**T = 800 K**

| P (Torr) | TAR <sup>a)</sup> | CAR-1 <sup>b)</sup> | CAR-2 <sup>c)</sup> | SSA <sup>d)</sup> |
|----------|-------------------|---------------------|---------------------|-------------------|
| 0.1      | 8.022E-15         | 8.022E-15           | 8.020E-15           | 7.319E-15         |
| 0.3      | 2.091E-14         | 2.090E-14           | 2.090E-14           | 1.918E-14         |
| 0.5      | 3.244E-14         | 3.241E-14           | 3.243E-14           | 2.985E-14         |
| 0.7      | 4.320E-14         | 4.321E-14           | 4.320E-14           | 3.984E-14         |
| 1        | 5.839E-14         | 5.838E-14           | 5.839E-14           | 5.395E-14         |
| 3        | 1.444E-13         | 1.444E-13           | 1.444E-13           | 1.344E-13         |
| 5        | 2.168E-13         | 2.167E-13           | 2.168E-13           | 2.025E-13         |
| 7        | 2.815E-13         | 2.814E-13           | 2.815E-13           | 2.636E-13         |
| 10       | 3.690E-13         | 3.690E-13           | 3.691E-13           | 3.465E-13         |
| 30       | 8.110E-13         | 8.108E-13           | 8.111E-13           | 7.683E-13         |
| 50       | 1.139E-12         | 1.138E-12           | 1.139E-12           | 1.083E-12         |
| 70       | 1.410E-12         | 1.409E-12           | 1.410E-12           | 1.345E-12         |
| 100      | 1.752E-12         | 1.751E-12           | 1.752E-12           | 1.677E-12         |
| 300      | 3.220E-12         | 3.216E-12           | 3.221E-12           | 3.108E-12         |
| 500      | 4.135E-12         | 4.128E-12           | 4.135E-12           | 4.007E-12         |
| 700      | 4.818E-12         | 4.808E-12           | 4.819E-12           | 4.680E-12         |
| 1000     | 5.606E-12         | 5.605E-12           | 5.608E-12           | 5.459E-12         |

- Thermally activated reaction model ( $\text{C}_2\text{H}_5 \rightarrow \text{C}_2\text{H}_4 + \text{H}$ ).
- Chemically activated reaction model ( $\text{C}_2\text{H}_4 + \text{H} \rightleftharpoons \text{C}_2\text{H}_5$ ), and  $k(T,p) = k_\infty \times (1 - \gamma_H)$  as recommended in the Multiwell software package by John R. Barker.
- Chemically activated reaction model ( $\text{C}_2\text{H}_4 + \text{H} \rightleftharpoons \text{C}_2\text{H}_5$ ), and Eq. 20 (see the main text).
- Steady state approach for a chemically activated reaction, and Eq. 15 (see the main text). This SSA model starts to break down at 800 K, but it remains valid when  $T < 800$  K.

**Table S5 (Continued):** A comparison of the calculated rate coefficients (cm<sup>3</sup>/s) at 1000 K as a function of pressure for the C<sub>2</sub>H<sub>4</sub> + H → C<sub>2</sub>H<sub>5</sub> reaction using four different ME approaches

**T = 1000 K**

| P (Torr) | TAR <sup>a)</sup> | CAR-1 <sup>b)</sup> | CAR-2 <sup>c)</sup> | SSA <sup>d)</sup> |
|----------|-------------------|---------------------|---------------------|-------------------|
| 1        | 2.585E-14         | 2.559E-14           | 2.586E-14           | 1.785E-14         |
| 3        | 6.740E-14         |                     | 6.746E-14           | 4.713E-14         |
| 5        | 1.040E-13         |                     | 1.041E-13           | 7.324E-14         |
| 7        | 1.377E-13         |                     | 1.378E-13           | 9.748E-14         |
| 10       | 1.846E-13         | 1.834E-13           | 1.848E-13           | 1.314E-13         |
| 30       | 4.388E-13         |                     | 4.393E-13           | 3.188E-13         |
| 50       | 6.430E-13         |                     | 6.435E-13           | 4.723E-13         |
| 70       | 8.206E-13         |                     | 8.212E-13           | 6.075E-13         |
| 100      | 1.055E-12         | 1.024E-12           | 1.056E-12           | 7.879E-13         |
| 300      | 2.180E-12         |                     | 2.182E-12           | 1.678E-12         |
| 500      | 2.975E-12         |                     | 2.977E-12           | 2.325E-12         |
| 700      | 3.614E-12         |                     | 3.617E-12           | 2.855E-12         |
| 1000     | 4.401E-12         | 4.367E-12           | 4.404E-12           | 3.520E-12         |
| 3000     | 7.590E-12         |                     | 7.597E-12           | 6.319E-12         |
| 5000     | 9.454E-12         |                     | 9.461E-12           | 8.024E-12         |
| 7000     | 1.079E-11         |                     | 1.080E-11           | 9.277E-12         |
| 10000    | 1.228E-11         | 1.228E-11           | 1.229E-11           | 1.070E-11         |

d). At 1000 K, the SSA model completely breaks down.

**T = 2000 K**

| P (Torr) | TAR <sup>a)</sup> | CAR-1 <sup>b)</sup> | CAR-2 <sup>c)</sup> |
|----------|-------------------|---------------------|---------------------|
| 1        | 8.104E-16         | 8.107E-16           | 8.111E-16           |
| 3        | 2.304E-15         | 2.306E-15           | 2.306E-15           |
| 5        | 3.726E-15         | 3.729E-15           | 3.730E-15           |
| 7        | 5.106E-15         | 5.108E-15           | 5.109E-15           |
| 10       | 7.108E-15         | 7.116E-15           | 7.116E-15           |
| 30       | 1.946E-14         | 1.948E-14           | 1.948E-14           |
| 50       | 3.085E-14         | 3.088E-14           | 3.087E-14           |
| 70       | 4.165E-14         | 4.170E-14           | 4.169E-14           |
| 100      | 5.711E-14         | 5.719E-14           | 5.718E-14           |
| 300      | 1.484E-13         | 1.486E-13           | 1.486E-13           |



|        |           |           |           |
|--------|-----------|-----------|-----------|
| 500    | 2.291E-13 | 2.294E-13 | 2.293E-13 |
| 700    | 3.038E-13 | 3.042E-13 | 3.040E-13 |
| 1000   | 4.083E-13 | 4.087E-13 | 4.083E-13 |
| 3000   | 9.884E-13 | 9.900E-13 | 9.891E-13 |
| 5000   | 1.470E-12 | 1.472E-12 | 1.471E-12 |
| 7000   | 1.899E-12 | 1.902E-12 | 1.900E-12 |
| 10000  | 2.477E-12 | 2.481E-12 | 2.479E-12 |
| 30000  | 5.414E-12 | 5.424E-12 | 5.418E-12 |
| 50000  | 7.620E-12 | 7.635E-12 | 7.627E-12 |
| 70000  | 9.466E-12 | 9.481E-12 | 9.473E-12 |
| 100000 | 1.182E-11 | 1.183E-11 | 1.183E-11 |

**T = 3000 K**

| P (Torr) | TAR <sup>a)</sup> | CAR-2 <sup>c)</sup> |
|----------|-------------------|---------------------|
| 1        | 1.984E-16         | 1.983E-16           |
| 3        | 5.712E-16         | 5.707E-16           |
| 5        | 9.299E-16         | 9.292E-16           |
| 7        | 1.280E-15         | 1.279E-15           |
| 10       | 1.793E-15         | 1.791E-15           |
| 30       | 5.006E-15         | 5.001E-15           |
| 50       | 8.024E-15         | 8.014E-15           |
| 70       | 1.092E-14         | 1.091E-14           |
| 100      | 1.512E-14         | 1.510E-14           |
| 300      | 4.065E-14         | 4.058E-14           |
| 500      | 6.391E-14         | 6.380E-14           |
| 700      | 8.587E-14         | 8.572E-14           |
| 1000     | 1.172E-13         | 1.169E-13           |
| 3000     | 2.998E-13         | 2.991E-13           |
| 5000     | 4.595E-13         | 4.586E-13           |
| 7000     | 6.065E-13         | 6.056E-13           |
| 10000    | 8.113E-13         | 8.102E-13           |
| 30000    | 1.939E-12         | 1.940E-12           |
| 50000    | 2.865E-12         | 2.872E-12           |
| 70000    | 3.683E-12         | 3.700E-12           |
| 100000   | 4.778E-12         | 4.816E-12           |

**Table S6:** Calculated tunneling corrections as a function of temperature for the  $C_2H_3 + H_2 \rightarrow C_2H_4 + H$  reaction using the SCTST theory.

| T(K) | k(T) without tun. | k(T) with tun. | Tun. Correction ( $\kappa(T)$ ) |
|------|-------------------|----------------|---------------------------------|
| 300  | 1.07E-18          | 4.12E-18       | 3.84E+00                        |
| 325  | 3.36E-18          | 1.05E-17       | 3.13E+00                        |
| 350  | 8.94E-18          | 2.39E-17       | 2.67E+00                        |
| 375  | 2.09E-17          | 4.94E-17       | 2.36E+00                        |
| 400  | 4.42E-17          | 9.41E-17       | 2.13E+00                        |
| 425  | 8.56E-17          | 1.68E-16       | 1.96E+00                        |
| 450  | 1.54E-16          | 2.82E-16       | 1.83E+00                        |
| 475  | 2.62E-16          | 4.52E-16       | 1.72E+00                        |
| 500  | 4.24E-16          | 6.94E-16       | 1.64E+00                        |
| 525  | 6.56E-16          | 1.03E-15       | 1.57E+00                        |
| 550  | 9.77E-16          | 1.48E-15       | 1.51E+00                        |
| 575  | 1.41E-15          | 2.06E-15       | 1.46E+00                        |
| 600  | 1.98E-15          | 2.81E-15       | 1.42E+00                        |
| 625  | 2.70E-15          | 3.75E-15       | 1.38E+00                        |
| 650  | 3.62E-15          | 4.90E-15       | 1.35E+00                        |
| 675  | 4.75E-15          | 6.30E-15       | 1.33E+00                        |
| 700  | 6.13E-15          | 7.98E-15       | 1.30E+00                        |
| 725  | 7.78E-15          | 9.96E-15       | 1.28E+00                        |
| 750  | 9.74E-15          | 1.23E-14       | 1.26E+00                        |
| 775  | 1.20E-14          | 1.50E-14       | 1.24E+00                        |
| 800  | 1.47E-14          | 1.81E-14       | 1.23E+00                        |
| 825  | 1.78E-14          | 2.16E-14       | 1.22E+00                        |
| 850  | 2.13E-14          | 2.56E-14       | 1.20E+00                        |
| 875  | 2.53E-14          | 3.01E-14       | 1.19E+00                        |
| 900  | 2.98E-14          | 3.52E-14       | 1.18E+00                        |
| 925  | 3.49E-14          | 4.08E-14       | 1.17E+00                        |
| 950  | 4.05E-14          | 4.70E-14       | 1.16E+00                        |
| 975  | 4.67E-14          | 5.39E-14       | 1.15E+00                        |
| 1000 | 5.36E-14          | 6.14E-14       | 1.15E+00                        |
| 1025 | 6.12E-14          | 6.96E-14       | 1.14E+00                        |
| 1050 | 6.95E-14          | 7.86E-14       | 1.13E+00                        |
| 1075 | 7.85E-14          | 8.83E-14       | 1.13E+00                        |
| 1100 | 8.83E-14          | 9.88E-14       | 1.12E+00                        |
| 1125 | 9.89E-14          | 1.10E-13       | 1.11E+00                        |

|      |          |          |          |
|------|----------|----------|----------|
| 1150 | 1.10E-13 | 1.22E-13 | 1.11E+00 |
| 1175 | 1.23E-13 | 1.35E-13 | 1.10E+00 |
| 1200 | 1.36E-13 | 1.49E-13 | 1.10E+00 |
| 1225 | 1.50E-13 | 1.64E-13 | 1.10E+00 |
| 1250 | 1.65E-13 | 1.80E-13 | 1.09E+00 |
| 1275 | 1.81E-13 | 1.97E-13 | 1.09E+00 |
| 1300 | 1.98E-13 | 2.15E-13 | 1.08E+00 |
| 1325 | 2.17E-13 | 2.34E-13 | 1.08E+00 |
| 1350 | 2.36E-13 | 2.54E-13 | 1.08E+00 |
| 1375 | 2.56E-13 | 2.76E-13 | 1.08E+00 |
| 1400 | 2.78E-13 | 2.98E-13 | 1.07E+00 |
| 1425 | 3.00E-13 | 3.21E-13 | 1.07E+00 |
| 1450 | 3.24E-13 | 3.46E-13 | 1.07E+00 |
| 1475 | 3.49E-13 | 3.72E-13 | 1.06E+00 |
| 1500 | 3.75E-13 | 3.99E-13 | 1.06E+00 |
| 1525 | 4.03E-13 | 4.27E-13 | 1.06E+00 |
| 1550 | 4.32E-13 | 4.57E-13 | 1.06E+00 |
| 1575 | 4.62E-13 | 4.88E-13 | 1.06E+00 |
| 1600 | 4.93E-13 | 5.20E-13 | 1.05E+00 |
| 1625 | 5.25E-13 | 5.53E-13 | 1.05E+00 |
| 1650 | 5.59E-13 | 5.88E-13 | 1.05E+00 |
| 1675 | 5.94E-13 | 6.24E-13 | 1.05E+00 |
| 1700 | 6.31E-13 | 6.61E-13 | 1.05E+00 |
| 1725 | 6.69E-13 | 7.00E-13 | 1.05E+00 |
| 1750 | 7.08E-13 | 7.40E-13 | 1.04E+00 |
| 1775 | 7.48E-13 | 7.81E-13 | 1.04E+00 |
| 1800 | 7.90E-13 | 8.24E-13 | 1.04E+00 |
| 1825 | 8.34E-13 | 8.68E-13 | 1.04E+00 |
| 1850 | 8.78E-13 | 9.13E-13 | 1.04E+00 |
| 1875 | 9.24E-13 | 9.60E-13 | 1.04E+00 |
| 1900 | 9.72E-13 | 1.01E-12 | 1.04E+00 |
| 1925 | 1.02E-12 | 1.06E-12 | 1.04E+00 |
| 1950 | 1.07E-12 | 1.11E-12 | 1.03E+00 |
| 1975 | 1.12E-12 | 1.16E-12 | 1.03E+00 |
| 2000 | 1.18E-12 | 1.21E-12 | 1.03E+00 |

## Optimized geometries of various species

**C<sub>2</sub>H<sub>3</sub> (C<sub>s</sub>, <sup>2</sup>A')**: ae-CCSD(T)/cc-pVQZ // UHF

HEAT-345Q

C

C 1 R1\*

H 1 R2\* 2 A1\*

H 1 R3\* 2 A2\* 3 T180

H 2 R4\* 1 A3\* 3 T180

R1 = 1.307413290373744

R2 = 1.081723724184898

A1 = 122.057880654972905

R3 = 1.087181560366102

A2 = 121.279851219171391

T180 = 180.000000000000000

R4 = 1.075581119201201

A3 = 137.363322899459064

**C<sub>2</sub>H<sub>4</sub> (D<sub>2h</sub>, <sup>1</sup>A<sub>1</sub>)**: ae-CCSD(T)/cc-pVQZ // RHF

HEAT-345Q

C

C 1 R1\*

H 1 R2\* 2 A1\*

H 1 R2\* 2 A1\* 3 D180

H 2 R2\* 1 A1\* 3 D180

H 2 R2\* 1 A1\* 5 D180

R1 = 1.330902917626653

R2 = 1.079752371421382

A1 = 121.448016067414059

D180 = 180.000000000000000

**C<sub>2</sub>H<sub>5</sub> (C<sub>s</sub>, <sup>2</sup>A')**: ae-CCSD(T)/cc-pVQZ // UHF

HEAT-345Q

C

C 1 R1

H 1 R2 2 A1

H 1 R3 2 A2 3 T1

H 1 R3 2 A2 3 T2  
H 2 R4 1 A3 3 T3  
H 2 R4 1 A3 3 T4

R1 = 1.484754348094979  
R2 = 1.095430448603470  
A1 = 111.646939695568605  
R3 = 1.088412112085974  
A2 = 111.580217293014798  
T1 = 119.360318042895344  
T2 = -119.360318042895344  
R4 = 1.077652719659850  
A3 = 120.813623360314452  
T3 = 85.455662573944480  
T4 = -85.455662573944480

**TS1 (C<sub>s</sub>, <sup>2</sup>A')**: ae-CCSD(T)/cc-pVQZ // UHF

HEAT-345Q

H

C 1 R1\*

C 2 R2\* 1 A1\*

H 2 R3\* 3 A2\* 1 T1\*

H 2 R3\* 3 A2\* 1 T2\*

H 3 R4\* 2 A3\* 1 T3\*

H 3 R4\* 2 A3\* 1 T4\*

R1 = 1.981950449111066  
R2 = 1.341149588425816  
A1 = 106.655914053263487  
R3 = 1.079445246175276  
A2 = 121.248975399909156  
T1 = 94.655688607126208  
T2 = -94.655688607126208  
R4 = 1.079247392069564  
A3 = 121.328812222024141  
T3 = 88.799300980087395  
T4 = -88.799300980087395

**TS1 (C<sub>s</sub>, <sup>2</sup>A')**: ae-CCSD(T)/cc-pVQZ // ROHF

HEAT-345Q

H

C 1 R1\*  
C 2 R2\* 1 A1\*  
H 2 R3\* 3 A2\* 1 T1\*  
H 2 R3\* 3 A2\* 1 T2\*  
H 3 R4\* 2 A3\* 1 T3\*  
H 3 R4\* 2 A3\* 1 T4\*

R1 = 1.982646393556012  
R2 = 1.343265335057637  
A1 = 106.560181074648682  
R3 = 1.079480329790683  
A2 = 121.229700627428400  
T1 = 94.718156988897547  
T2 = -94.718156988897547  
R4 = 1.079315572788190  
A3 = 121.315855945123403  
T3 = 88.775569747622228  
T4 = -88.775569747622228

**TS2 (C<sub>s</sub>, <sup>2</sup>A')**: ae-CCSD(T)/cc-pVQZ // UHF

HEAT-345Q

C  
C 1 R1\*  
H 1 R2\* 2 A1\*  
H 2 R3\* 1 A2\* 3 T180  
H 2 R4\* 1 A3\* 4 T180  
H 1 R5\* 2 A4\* 3 T180  
X 6 R0 1 A5\* 3 T180  
H 6 R6\* 7 A5\* 1 T180

R1 = 1.314696068503856  
R2 = 1.078080276583277  
A1 = 131.559284241466571  
R3 = 1.081392379108812  
A2 = 121.406021847894522  
T180 = 180.000000000000000  
R4 = 1.083852697068704  
A3 = 121.430010447996494  
R5 = 1.446328141095375  
A4 = 114.483549666949699  
R0 = 1.000000000000000  
A5 = 87.390531570229783  
R6 = 0.862813820478743

**TS3 (C<sub>2v</sub>, <sup>2</sup>B<sub>1</sub>):** ae-CCSD(T)/cc-pVQZ // UHF

HEAT-345Q

X

H 1 R0

C 2 R1\* 1 A1\*

C 2 R1\* 1 A1\* 3 T180

H 3 R2\* 2 A2\* 1 T90\*

H 3 R2\* 2 A2\* 1 Tm90\*

H 4 R2\* 2 A2\* 1 T90\*

H 4 R2\* 2 A2\* 1 Tm90\*

R0 = 1.0000000000000000

R1 = 1.290216448720350

A1 = 144.866813199303550

T180 = 180.0000000000000000

R2 = 1.076159762632992

A2 = 112.708317862970560

T90 = 69.290755272482755

Tm90 = -69.290755272482755

## Ro-vibrational parameters and anharmonic constants (all in $\text{cm}^{-1}$ ) for various species

### $\text{C}_2\text{H}_3$

|            | ANO2 a)   |     | ANO1 b)  |          |          |          |          |         |          |          |          |  |
|------------|-----------|-----|----------|----------|----------|----------|----------|---------|----------|----------|----------|--|
| $\omega_1$ | 723.7815  | x11 | -3.1037  |          |          |          |          |         |          |          |          |  |
| $\omega_2$ | 825.7328  | x2i | 2.5757   | 1.0783   |          |          |          |         |          |          |          |  |
| $\omega_3$ | 925.1483  | x3i | 3.8283   | -0.0940  | -0.2882  |          |          |         |          |          |          |  |
| $\omega_4$ | 1070.7801 | x4i | -34.9720 | 0.6219   | 1.7690   | -7.3640  |          |         |          |          |          |  |
| $\omega_5$ | 1396.2211 | x5i | -0.4151  | -1.1211  | -5.6418  | -4.1735  | -3.3217  |         |          |          |          |  |
| $\omega_6$ | 1642.3325 | x6i | -2.0176  | -7.9209  | -6.9465  | -11.2744 | -6.4847  | -7.1344 |          |          |          |  |
| $\omega_7$ | 3076.9052 | x7i | -5.4179  | -5.8609  | -8.2251  | -8.7029  | -16.8495 | -7.8422 | -47.7603 |          |          |  |
| $\omega_8$ | 3182.3996 | x8i | -7.0895  | -5.8476  | -15.5273 | -11.2059 | -18.7664 | 1.9991  | -62.4763 | -48.9464 |          |  |
| $\omega_9$ | 3252.9634 | x9i | 0.1749   | -10.1917 | -3.5752  | 1.5972   | -1.7544  | -0.9093 | 0.6039   | 2.0052   | -61.8138 |  |

Three rotational constants ( $\text{cm}^{-1}$ )

|   |        |
|---|--------|
| A | 7.8037 |
| B | 1.0880 |
| C | 0.9549 |

- a) Obtained at fc-CCSD(T)/ANO2 level of theory  
 b) Calculated at fc-CCSD(T)/ANO1 level of theory

### $\text{C}_2\text{H}_4$

Harmonic vib. frequencies ( $\text{cm}^{-1}$ )

|               | ANO2 (in $\text{cm}^{-1}$ ) |
|---------------|-----------------------------|
| $\omega_1$    | 823.9830                    |
| $\omega_2$    | 951.8802                    |
| $\omega_3$    | 965.8709                    |
| $\omega_4$    | 1051.7872                   |
| $\omega_5$    | 1246.7681                   |
| $\omega_6$    | 1367.8359                   |
| $\omega_7$    | 1476.5674                   |
| $\omega_8$    | 1670.8931                   |
| $\omega_9$    | 3140.1665                   |
| $\omega_{10}$ | 3158.7995                   |



|               |           |
|---------------|-----------|
| $\omega_{11}$ | 3224.1575 |
| $\omega_{12}$ | 3250.3880 |

Three rotational constants ( $\text{cm}^{-1}$ )

|                          |        |
|--------------------------|--------|
| A (in $\text{cm}^{-1}$ ) | 4.9039 |
| B                        | 1.0038 |
| C                        | 0.8333 |

Anharmonic constants ( $\text{cm}^{-1}$ )

| <b>ANO1</b> | <b>1</b> | <b>2</b>  | <b>3</b>  | <b>4</b>  |
|-------------|----------|-----------|-----------|-----------|
| x11         | 4.3442   |           |           |           |
| x2i         | 0.7569   | 2.3874    |           |           |
| x3i         | 6.1162   | 0.6447    | 0.9274    |           |
| x4i         | 1.2604   | -5.8769   | -8.3740   | -1.8225   |
| x5i         | -6.1974  | 5.0296    | 1.6302    | 0.1798    |
| x6i         | 1.8536   | -3.0486   | -2.3630   | -3.8531   |
| x7i         | -3.6984  | -3.2823   | -4.0933   | 1.7472    |
| x8i         | -7.8406  | -7.2307   | -7.2805   | -3.9021   |
| x9i         | -3.6327  | -5.1113   | -4.4890   | -6.7800   |
| x10i        | -3.2009  | -6.4196   | -4.7058   | -6.6592   |
| x11i        | -4.9923  | -9.5793   | -7.8258   | -5.4790   |
| x12i        | -2.8880  | -8.8687   | -8.2962   | -5.9247   |
|             | <b>5</b> | <b>6</b>  | <b>7</b>  | <b>8</b>  |
| x55         | -0.2895  |           |           |           |
| x6i         | -2.2715  | -0.9409   |           |           |
| x7i         | -5.6368  | -5.0667   | -3.0889   |           |
| x8i         | -15.1488 | -9.2395   | -1.9102   | -0.8700   |
| x9i         | -5.4373  | -5.2213   | -13.0393  | -8.1338   |
| x10i        | -6.6838  | -5.5998   | -3.2687   | -22.2981  |
| x11i        | -1.2917  | -7.2734   | -11.5576  | 3.0821    |
| x12i        | -6.2928  | -7.1946   | -10.2969  | -1.9772   |
|             | <b>9</b> | <b>10</b> | <b>11</b> | <b>12</b> |
| x99         | -13.7476 |           |           |           |
| x10i        | -55.3970 | -13.7848  |           |           |
| x11i        | -56.5743 | -58.6835  | -16.1203  |           |
| x12i        | -57.8048 | -56.4728  | -64.9344  | -16.0017  |

## C<sub>2</sub>H<sub>5</sub>

Harmonic vib. frequencies (cm<sup>-1</sup>)

|                          | ANO2 (cm <sup>-1</sup> ) |
|--------------------------|--------------------------|
| <b>ω1 (1DHR)</b>         | <b>120.9308</b>          |
| ω2                       | 467.7380                 |
| ω3                       | 809.3232                 |
| ω4                       | 987.4477                 |
| ω5                       | 1071.3188                |
| ω6                       | 1201.1202                |
| ω7                       | 1404.5662                |
| ω8                       | 1477.2985                |
| ω9                       | 1492.0082                |
| ω10                      | 1492.0789                |
| ω11                      | 2986.2513                |
| ω12                      | 3068.4187                |
| ω13                      | 3113.6714                |
| ω14                      | 3159.3045                |
| ω15                      | 3265.1512                |
|                          |                          |
| Rotational constants     |                          |
| A (in cm <sup>-1</sup> ) | 3.4689                   |
| B                        | 0.7591                   |
| C                        | 0.7039                   |

### 1DHR potential

$$V_{1DHR} = \frac{V_o}{2}(1 - \cos 3\theta), \text{ with } V_o = 30 \text{ cm}^{-1} \text{ and } B_{hr} = 16 \text{ cm}^{-1}$$

### Anharmonic constants (cm<sup>-1</sup>)

|     | ANO1     |         |         |         |
|-----|----------|---------|---------|---------|
| x11 | -66.5374 |         |         |         |
| x2i | -28.3026 | 16.1158 |         |         |
| x3i | 14.3320  | 15.7641 | 3.7860  |         |
| x4i | -3.1186  | 1.5941  | -0.8608 | -1.5916 |

|       |          |          |           |           |
|-------|----------|----------|-----------|-----------|
| x5i   | -1.2856  | -3.7080  | -1.6363   | -4.2507   |
| x6i   | -21.0127 | -1.6752  | -4.2197   | -7.6575   |
| x7i   | 2.6467   | -0.6979  | -0.5183   | -5.5803   |
| x8i   | 2.4729   | 5.2013   | -3.4305   | -2.6700   |
| x9i   | -1.7249  | 2.5167   | -6.7878   | -4.2974   |
| x10i  | -2.0554  | 0.2218   | -3.2053   | -6.1197   |
| x11i  | 27.0236  | 8.6438   | -0.6061   | -10.4427  |
| x12i  | -11.0857 | 0.8991   | -2.3042   | -0.8768   |
| x13i  | -12.8979 | -0.5310  | -2.3181   | -4.1164   |
| x14i  | 6.3665   | -12.4531 | -4.2939   | -1.5725   |
| x15i  | 8.0489   | -18.9154 | -4.9163   | 0.0350    |
|       |          |          |           |           |
| x55   | -5.5251  |          |           |           |
| x6i   | -4.9089  | -1.6753  |           |           |
| x7i   | -4.8848  | -2.6993  | -7.9437   |           |
| x8i   | -2.5616  | -5.4478  | -2.8990   | -4.2150   |
| x9i   | -3.2374  | -7.3201  | -3.6965   | -16.3829  |
| x10i  | -1.3344  | -5.1115  | -4.9181   | -2.7673   |
| x11i  | 2.4840   | 1.4227   | 2.0284    | -5.8662   |
| x12i  | 0.9516   | -5.1087  | -2.8412   | -1.6679   |
| x13i  | 0.8205   | -3.8459  | -6.4572   | -8.3597   |
| x14i  | -1.1499  | -4.0872  | -1.0211   | 2.1353    |
| x15i  | -0.0395  | -3.6299  | -1.2601   | -9.7636   |
|       |          |          |           |           |
| x99   | -2.1390  |          |           |           |
| x10i  | -2.1252  | -1.2562  |           |           |
| x11i  | -2.9565  | -26.1300 | -52.2687  |           |
| x12i  | -9.0668  | -15.9513 | -41.9263  | -24.5143  |
| x13i  | -11.9221 | -9.7745  | -8.5142   | -111.7388 |
| x14i  | 2.5334   | -0.5240  | 0.0784    | 0.2501    |
| x15i  | -7.6108  | -0.5076  | 0.0427    | -0.1926   |
|       |          |          |           |           |
| x1313 |          | -32.9545 |           |           |
| x14i  |          | -0.3972  | -28.3601  |           |
| x15i  |          | -0.9953  | -115.8986 | -33.0685  |

**TS1 (H-addition):**  $C_2H_4 + H = C_2H_5$ Harmonic vib. frequencies ( $cm^{-1}$ )

|               | ANO2      |      | ANO1//ROHF |      | ANO1//UHF |
|---------------|-----------|------|------------|------|-----------|
| $\omega_F$    | 767.4551i | xFF  | -140.3099  | xFF  | -135.5767 |
| $\omega_2$    | 370.1676  | x2F  | 96.0464i   | x2F  | 92.2658i  |
| $\omega_3$    | 401.3949  | x3F  | 88.5148i   | x3F  | 84.9941i  |
| $\omega_4$    | 821.8382  | x4F  | -1.5688i   | x4F  | -1.4944i  |
| $\omega_5$    | 931.5782  | x5F  | -8.3165i   | x5F  | -9.5865i  |
| $\omega_6$    | 989.8053  | x6F  | 15.9583i   | x6F  | 12.5083i  |
| $\omega_7$    | 1044.9995 | x7F  | -1.5978i   | x7F  | -3.3770i  |
| $\omega_8$    | 1245.9548 | x8F  | -0.1202i   | x8F  | -0.2021i  |
| $\omega_9$    | 1344.0524 | x9F  | -12.6583i  | x9F  | -15.4547i |
| $\omega_{10}$ | 1473.9225 | x10F | -0.6742i   | x10F | -0.5546i  |
| $\omega_{11}$ | 1630.0208 | x11F | -16.9948i  | x11F | -22.4470i |
| $\omega_{12}$ | 3145.5794 | x12F | 2.0521i    | x12F | 2.4312i   |
| $\omega_{13}$ | 3160.1214 | x13F | 0.3138i    | x13F | 0.3076i   |
| $\omega_{14}$ | 3230.7760 | x14F | 2.4960i    | x14F | 2.8817i   |
| $\omega_{15}$ | 3256.2492 | x15F | 2.2070i    | x15F | 2.5923i   |
|               |           |      |            |      |           |
| A             | 2.5384    |      |            |      |           |
| B             | 0.7655    |      |            |      |           |
| C             | 0.7577    |      |            |      |           |

Anharmonic constants ( $cm^{-1}$ ) based on ROHF reference

|      | ANO1    |         |         |         |
|------|---------|---------|---------|---------|
| x2i  | 16.0345 |         |         |         |
| x3i  | 25.7955 | 10.6079 |         |         |
| x4i  | -0.0539 | -1.3565 | 4.0408  |         |
| x5i  | -4.4511 | -5.4092 | 2.2118  | 3.0111  |
| x6i  | 9.6620  | 9.2680  | 2.8359  | 0.7933  |
| x7i  | -1.5530 | 4.4124  | 1.1411  | -5.4453 |
| x8i  | 0.7593  | -0.9412 | -5.9654 | 2.5701  |
| x9i  | -5.7409 | -4.6132 | 1.8176  | -2.6713 |
| x10i | -0.2677 | -1.5669 | -3.6771 | -3.8530 |
| x11i | -7.1966 | -5.2222 | -6.6580 | -7.5557 |
| x12i | 0.1074  | -0.3111 | -3.6370 | -4.9339 |

|       |          |          |          |          |
|-------|----------|----------|----------|----------|
| x13i  | -0.5003  | -0.9020  | -3.2029  | -5.9527  |
| x14i  | 0.3101   | -0.1679  | -4.9788  | -8.4569  |
| x15i  | 0.3100   | -0.3189  | -3.1020  | -9.4817  |
|       |          |          |          |          |
| x66   | 1.4572   |          |          |          |
| x7i   | -7.6258  | -1.9319  |          |          |
| x8i   | 1.4040   | -0.1624  | -0.4064  |          |
| x9i   | -3.7231  | -4.7518  | -2.2220  | -1.3253  |
| x10i  | -2.3949  | 0.0813   | -5.6425  | -3.9907  |
| x11i  | -7.1637  | -2.8043  | -13.8367 | -7.2183  |
| x12i  | -4.9088  | -6.3084  | -5.4191  | -4.5649  |
| x13i  | -4.9268  | -6.1624  | -6.5206  | -4.8564  |
| x14i  | -8.6007  | -5.2777  | -2.4295  | -5.6315  |
| x15i  | -7.3367  | -5.5725  | -6.2087  | -5.4657  |
|       |          |          |          |          |
| x1010 | -3.0954  |          |          |          |
| x11i  | -1.5867  | -2.8165  |          |          |
| x12i  | -14.5355 | -10.4016 | -13.8484 |          |
| x13i  | -3.4441  | -9.6859  | -55.4792 | -13.9026 |
| x14i  | -11.5307 | 0.0240   | -57.0367 | -58.4871 |
| x15i  | -10.3450 | -4.0409  | -57.4978 | -56.9514 |
|       |          |          |          |          |
| X1414 |          |          | -16.3626 |          |
| x15i  |          |          | -64.3319 | -16.2069 |

Anharmonic constants ( $\text{cm}^{-1}$ ) based on UHF reference

|      | ANO1    |         |         |         |
|------|---------|---------|---------|---------|
| x2i  | 15.7947 |         |         |         |
| x3i  | 25.3090 | 10.4867 |         |         |
| x4i  | -0.0179 | -1.3292 | 4.0906  |         |
| x5i  | -4.9511 | -5.8622 | 2.2737  | 2.8688  |
| x6i  | 8.9323  | 8.5877  | 2.8418  | 0.9463  |
| x7i  | -2.1268 | 3.7839  | 1.2487  | -4.8542 |
| x8i  | 0.7381  | -0.9331 | -5.9797 | 2.6278  |
| x9i  | -5.9965 | -4.7933 | 1.9586  | -2.3536 |
| x10i | -0.2259 | -1.5438 | -3.6674 | -3.5257 |
| x11i | -8.1947 | -6.1348 | -6.7831 | -6.7705 |
| x12i | 0.1965  | -0.2079 | -3.6163 | -4.7627 |

|       |          |         |          |          |
|-------|----------|---------|----------|----------|
| x13i  | -0.4402  | -0.8487 | -3.1841  | -5.9200  |
| x14i  | 0.4204   | -0.0581 | -4.9643  | -8.3049  |
| x15i  | 0.4257   | -0.2062 | -3.0509  | -9.4727  |
|       |          |         |          |          |
| x66   | 1.2173   |         |          |          |
| x7i   | -7.3940  | -1.5914 |          |          |
| x8i   | 1.4484   | 0.0098  | -0.3843  |          |
| x9i   | -3.6355  | -4.1085 | -2.1284  | -1.0242  |
| x10i  | -2.2048  | 0.1716  | -5.6281  | -4.1168  |
| x11i  | -7.0087  | -2.5882 | -13.9444 | -6.6733  |
| x12i  | -4.9094  | -6.2810 | -5.3969  | -4.6749  |
| x13i  | -4.7666  | -6.0465 | -6.5106  | -5.0027  |
| x14i  | -8.5971  | -5.2354 | -2.2469  | -5.9405  |
| x15i  | -7.1889  | -5.5096 | -6.1819  | -5.7616  |
|       |          |         |          |          |
| x1010 | -3.0876  |         |          |          |
| x11i  | -1.5486  | -2.7527 |          |          |
| x12i  | -14.2314 | -9.8997 | -13.8472 |          |
| x13i  | -3.4076  | -9.0524 | -55.2007 | -13.9043 |
| x14i  | -11.5034 | 0.6058  | -57.0672 | -58.1850 |
| x15i  | -10.3234 | -3.5844 | -57.1863 | -56.9863 |
|       |          |         |          |          |
| X1414 |          |         | -16.3540 |          |
| x15i  |          |         | -64.0215 | -16.1983 |

**TS2 (H-abstraction):**  $C_2H_3 + H_2 = H + C_2H_4$

Harmonic vib. frequencies ( $cm^{-1}$ )

|            | ANO2       |     | ANO1      |
|------------|------------|-----|-----------|
| $\omega_F$ | 1324.6845i | xFF | -188.4614 |
| $\omega_2$ | 270.2214   | x2F | 42.8014i  |
| $\omega_3$ | 369.9700   | x3F | 47.6905i  |
| $\omega_4$ | 820.5762   | x4F | 34.1140i  |
| $\omega_5$ | 907.2815   | x5F | 22.2190i  |
| $\omega_6$ | 945.1807   | x6F | 97.1985i  |
| $\omega_7$ | 961.1345   | x7F | 55.9111i  |

|                                     |           |      |            |
|-------------------------------------|-----------|------|------------|
| $\omega_8$                          | 1090.1186 | x8F  | 126.0746i  |
| $\omega_9$                          | 1150.9694 | x9F  | 55.0554i   |
| $\omega_{10}$                       | 1402.9928 | x10F | 0.6030i    |
| $\omega_{11}$                       | 1634.4538 | x11F | -18.7725i  |
| $\omega_{12}$                       | 2020.2071 | x12F | -719.5663i |
| $\omega_{13}$                       | 3113.3153 | x13F | 8.5032i    |
| $\omega_{14}$                       | 3201.9921 | x14F | 4.9874i    |
| $\omega_{15}$                       | 3222.0012 | x15F | -6.6256i   |
| Rot. Constants ( $\text{cm}^{-1}$ ) |           |      |            |
| A                                   | 2.3160    |      |            |
| B                                   | 0.8262    |      |            |
| C                                   | 0.6090    |      |            |

Anharmonic constants ( $\text{cm}^{-1}$ )

|      |           |          |           |           |
|------|-----------|----------|-----------|-----------|
|      | ANO1      |          |           |           |
| x2i  | 5.4362    |          |           |           |
| x3i  | 8.5864    | -0.1263  |           |           |
| x4i  | 3.9678    | 6.0822   | 1.5207    |           |
| x5i  | 2.2262    | 2.9678   | 1.2832    | 0.0693    |
| x6i  | 4.9963    | 4.7434   | 6.2374    | 1.2240    |
| x7i  | 3.2705    | 3.2502   | 3.9399    | 2.0405    |
| x8i  | 10.0911   | 3.3053   | 19.5157   | 5.6041    |
| x9i  | 8.7286    | 7.3529   | -1.0648   | 2.6045    |
| x10i | -0.3183   | -0.5538  | -0.5606   | -2.1553   |
| x11i | -2.3541   | -2.1965  | -8.0171   | -7.7348   |
| x12i | -27.0073  | -33.3051 | -33.1005  | -23.7729  |
| x13i | 0.9181    | -1.0165  | -3.4023   | -6.8178   |
| x14i | 0.7903    | -0.1331  | -4.0496   | -6.6477   |
| x15i | -1.4582   | -3.7108  | -6.0940   | -9.1372   |
|      |           |          |           |           |
| x66  | 21.4011   |          |           |           |
| x7i  | 38.7716   | 4.3712   |           |           |
| x8i  | 18.8874   | 11.7577  | 86.0359   |           |
| x9i  | 5.3233    | 3.8397   | 68.3730   | 1.9112    |
| x10i | -1.5365   | -3.3421  | -0.1255   | -1.3339   |
| x11i | -15.2214  | -11.3350 | -15.2662  | -10.4470  |
| x12i | -142.4893 | -76.1627 | -477.6116 | -117.7658 |
| x13i | -1.6311   | -4.1144  | -2.1672   | -2.7199   |

|       |          |          |          |          |
|-------|----------|----------|----------|----------|
| x14i  | -4.1193  | -9.7395  | -1.9704  | -3.7469  |
| x15i  | -4.0757  | -4.3671  | -3.9257  | -8.9607  |
|       |          |          |          |          |
| x1010 | -2.8839  |          |          |          |
| x11i  | -6.1315  | -4.1072  |          |          |
| x12i  | 1.3269   | 56.7401  | 309.5159 |          |
| x13i  | -15.5842 | -16.7884 | -10.3559 | -32.8144 |
| x14i  | -17.7090 | 0.0980   | -4.6527  | -92.1822 |
| x15i  | -2.2859  | -0.0883  | 8.5886   | -11.3268 |
|       |          |          |          |          |
| X1414 |          |          | -35.1459 |          |
| x15i  |          |          | -17.5354 | -53.6398 |

**TS3 (self-isomerization):**  $\text{CH}_3\text{-CH}_2 = \text{CH}_2\text{-CH}_3$

Rot-vibrational parameters

|               | ANO2       |      | ANO1      |
|---------------|------------|------|-----------|
| $\omega_F$    | 1939.2060i | xFF  | -77.6585  |
| $\omega_2$    | 562.6250   | x2F  | 11.4998i  |
| $\omega_3$    | 730.5467   | x3F  | -22.0354i |
| $\omega_4$    | 733.6306   | x4F  | -15.2601i |
| $\omega_5$    | 781.1570   | x5F  | -0.7756i  |
| $\omega_6$    | 1133.0625  | x6F  | 6.7879i   |
| $\omega_7$    | 1196.1857  | x7F  | -1.3776i  |
| $\omega_8$    | 1278.2507  | x8F  | 16.1550i  |
| $\omega_9$    | 1421.9647  | x9F  | -0.8977i  |
| $\omega_{10}$ | 1449.9166  | x10F | -4.6339i  |
| $\omega_{11}$ | 2231.5941  | x11F | -43.9037i |
| $\omega_{12}$ | 3163.9074  | x12F | 4.4052i   |
| $\omega_{13}$ | 3171.3154  | x13F | 4.5035i   |
| $\omega_{14}$ | 3275.7843  | x14F | 6.8416i   |
| $\omega_{15}$ | 3295.9487  | x15F | 6.7478i   |
|               |            |      |           |
| A             | 3.5921     |      |           |
| B             | 0.8016     |      |           |
| C             | 0.7228     |      |           |



Anharmonic constants ( $\text{cm}^{-1}$ )

|       |          |          |          |          |
|-------|----------|----------|----------|----------|
|       | ANO1     |          |          |          |
| x2i   | 10.2984  |          |          |          |
| x3i   | 19.2086  | 4.9853   |          |          |
| x4i   | 11.5131  | 11.9534  | -10.7225 |          |
| x5i   | 4.1715   | -1.7772  | 5.3367   | 4.3069   |
| x6i   | 2.4531   | -6.6765  | -5.3144  | -3.2882  |
| x7i   | -3.3910  | 1.1336   | -4.3800  | -5.5812  |
| x8i   | 17.0752  | -9.7449  | -6.3407  | -5.7236  |
| x9i   | 3.7719   | -1.6424  | -0.2042  | -3.2586  |
| x10i  | 10.7972  | 0.1842   | -0.6640  | -6.4331  |
| x11i  | -10.5250 | -8.4715  | -7.8468  | -0.0560  |
| x12i  | -9.1498  | -3.8933  | -0.7521  | -3.0234  |
| x13i  | -10.8910 | -5.8204  | 0.6180   | -2.7102  |
| x14i  | -11.1958 | -8.4254  | -4.0015  | -4.1864  |
| x15i  | -12.6925 | -8.7113  | -3.8720  | -2.8160  |
|       |          |          |          |          |
| x66   | -6.4991  |          |          |          |
| x7i   | -5.9018  | -1.1844  |          |          |
| x8i   | 0.2075   | -0.8720  | -1.0515  |          |
| x9i   | -4.3152  | -5.0396  | -1.4878  | -2.8963  |
| x10i  | -5.7843  | -8.0789  | 0.4570   | -15.4395 |
| x11i  | -9.9074  | -2.0710  | -36.4598 | -1.3269  |
| x12i  | -0.0064  | -4.5916  | -3.5463  | -3.0247  |
| x13i  | 0.2410   | -5.0511  | -3.9016  | -5.3718  |
| x14i  | 1.4979   | -3.8456  | -4.5693  | -11.1819 |
| x15i  | 1.0874   | -5.3435  | -5.1944  | -10.7363 |
|       |          |          |          |          |
| x1010 | -4.4882  |          |          |          |
| x11i  | -2.8893  | -29.0936 |          |          |
| x12i  | -2.7807  | 0.4836   | -14.5841 |          |
| x13i  | -1.0670  | -0.3919  | -58.1918 | -14.7212 |
| x14i  | -9.0928  | 0.9906   | -58.3092 | -59.9562 |
| x15i  | -10.2561 | -0.0835  | -59.1982 | -57.9707 |

|       |  |  |          |          |
|-------|--|--|----------|----------|
|       |  |  |          |          |
| X1414 |  |  | -17.1329 |          |
| x15i  |  |  | -67.6014 | -16.8619 |
